# Supplementary material for: Effect of Continuous Ingestion of Bifidobacteria and Inulin on Reducing Body Fat: A Randomized, Double-Blind, Placebo-Controlled, Parallel-Group Comparison Study
Source: MDPI journal article supplement (doi:10.3390/nu15245025), 2023-12-07
Supplement: s1 [file s1]

Table S2. Changes in waist and hip circumference during the treatment period.

| Parameter               |         | 0 weeks    | 4 weeks    | 8 weeks      | 12 weeks     |
|-------------------------|---------|------------|------------|--------------|--------------|
| Waist circumference, cm | Active  | 92.5 (0.8) | 92.5 (0.8) | 92.2 (0.8)   | 92.0 (0.8) * |
|                         | Placebo | 92.5 (0.7) | 92.6 (0.6) | 92.0 (0.7) * | 92.0 (0.8)   |
| Hip circumference, cm   | Active  | 98.2 (0.6) | 98.3 (0.6) | 97.9 (0.6) * | 97.9 (0.6)   |
|                         | Placebo | 98.4 (0.5) | 98.4 (0.5) | 98.0 (0.5) * | 98.1 (0.5)   |

All data are presented as the mean (standard error).

\*  $p < 0.05$  compared with week 0, paired  $t$ -test.
